# Supplementary material
Source: Springer Nature journal article supplement (https://www.springermedizin.de/resource/supplementary/12916_2008_156_MOESM2_ESM.pdf/9599284)

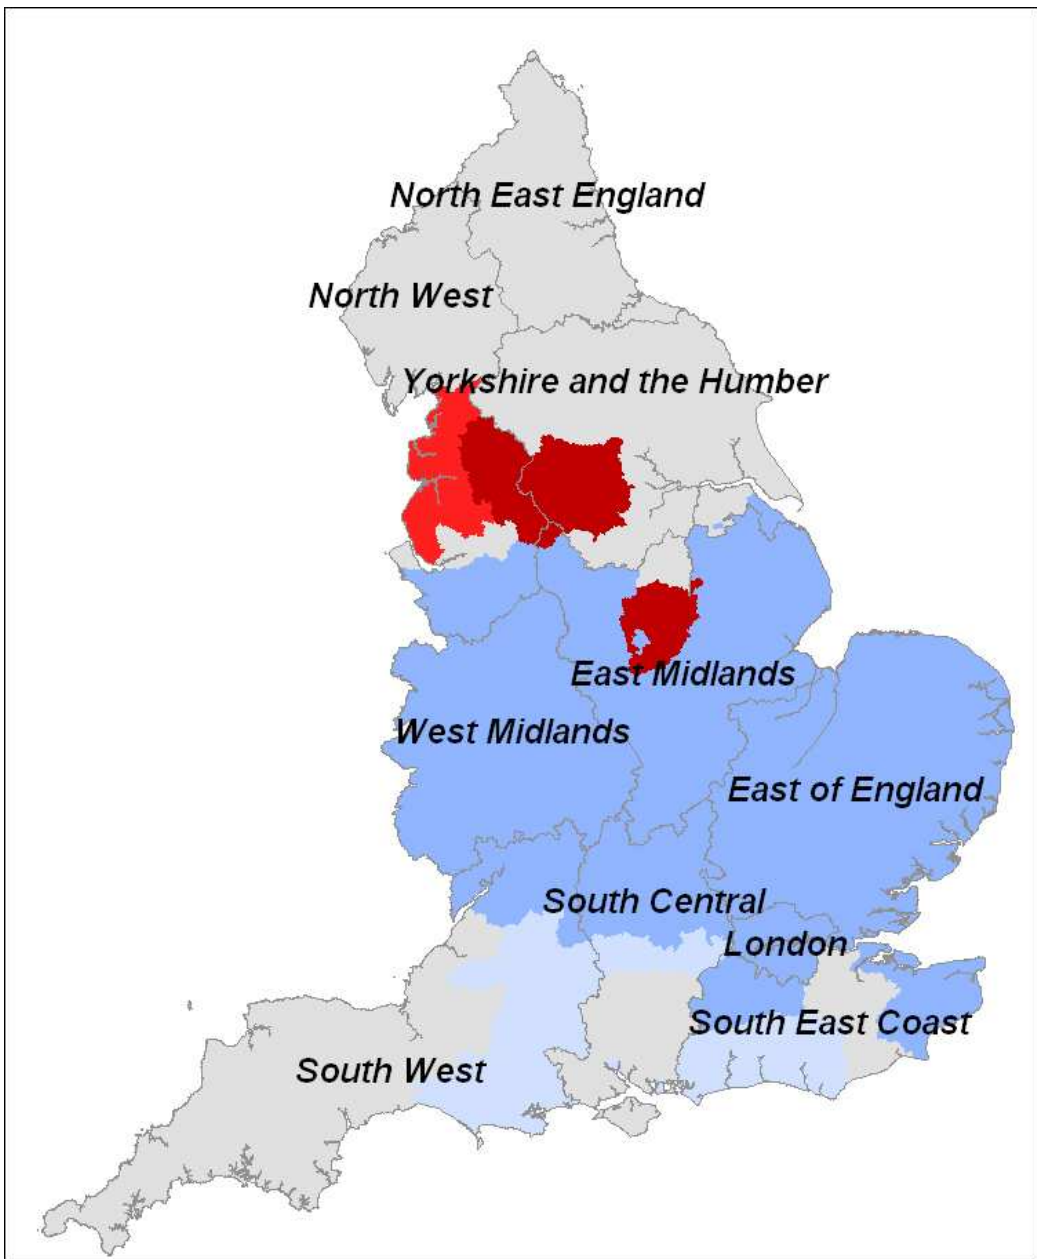

Strategic Health Authority

Relative risk by Primary Care Trust

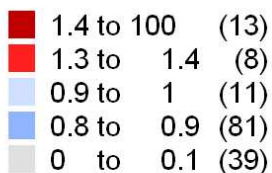

Supplement: MOESM2 [file 9599284]
